# Supplementary material for: Elevated Expression of Glycerol-3-Phosphate Phosphatase as a Biomarker of Poor Prognosis and Aggressive Prostate Cancer
Source: PubMed Central journal article supplement (PMC8000625; doi:10.3390/cancers13061273), 2021-03-13
Supplement: cancers-13-01273-s001.pdf [file cancers-13-01273-s001.pdf]

Supplementary

# Elevated Expression of Glycerol-3-Phosphate Phosphatase as a Biomarker of Poor Prognosis and Aggressive Prostate Cancer

Mohamed Amine Lounis, Veronique Ouellet, Benjamin Péant, Christine Caron, Zhenhong Li, Anfal Al-Mass, S.R Murthy Madiraju, Anne-Marie Mes-Masson, Marc Prentki and Fred Saad

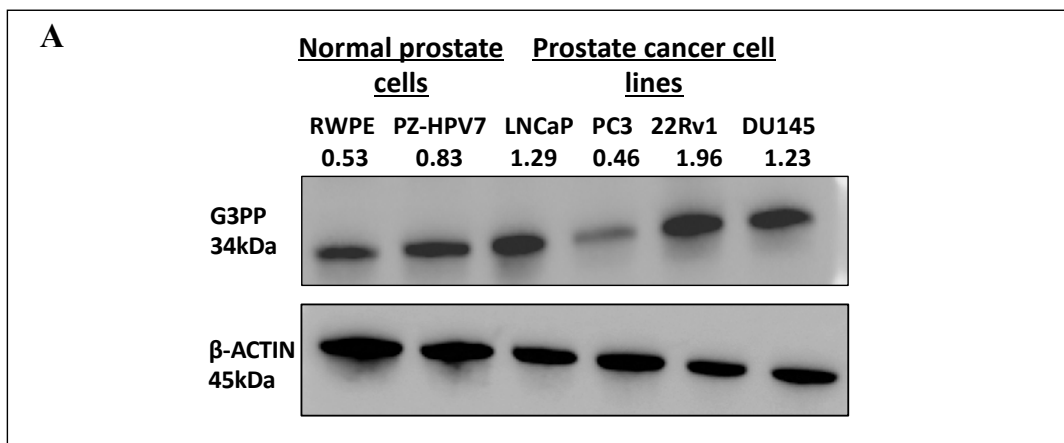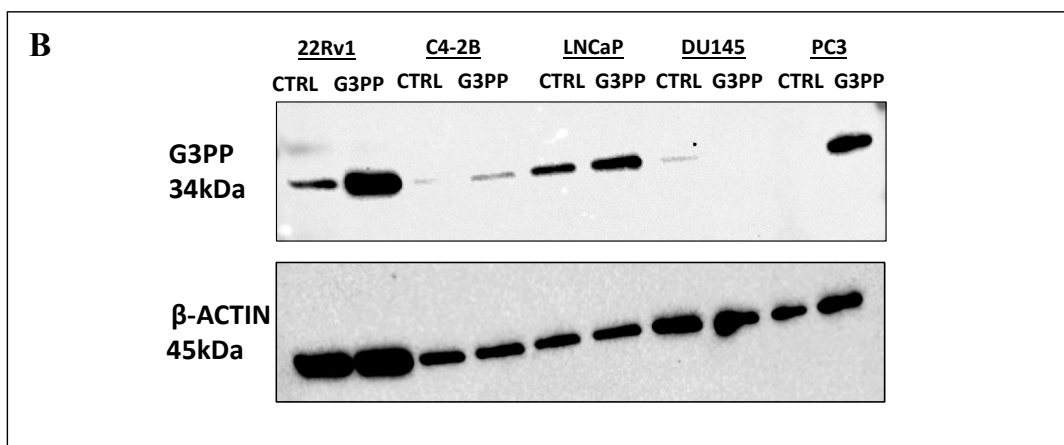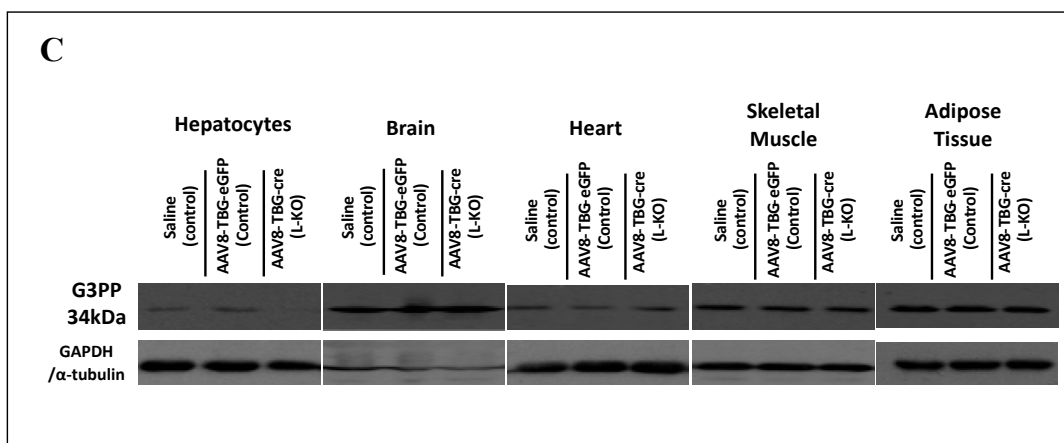

**Figure S1.** Validation of G3PP antibody by western blot analysis. (A) Western blot analysis of G3PP protein expression in two normal prostate epithelial cells (RWPE and PZ-HPV7) and four prostate cancer celllines (LNCaP, PC3, 22Rv1 and DU145) (B) Western blot analysis of prostate cancer cells transfected with Vector (CTR) or G3PP pcDNA G3PP (overexpression). (C) Liver specific deletion of G3PP/PGP using AAV8-TBG-cre virus, *in vivo*, in G3PP fl/fl mice. Male, 8 weeks old, G3PP flox/flox (fl/fl) mice fed standard chow diet (15% fat by energy; Harlan Teklad, Madison, WI, USA) received a single injection through the tail vein of AAV8-TBG-Cre (L-KO) or AAV8-TBG-eGFP (control) or only saline (control) (viral dose:  $5 \times 10^{10}$  Genome Copies/mice). After 4 weeks, the mice were sacrificed and different tissues were collected and hepatocytes were isolated from the livers by *in situ* collagenase (type XI; Sigma) perfusion. To validate G3PP deletion, protein was extracted from different tissues and hepatocytes and 40  $\mu$ g of protein from each extract was used for western blot (primary Ab.: G3PP/PGP Antibody (E-10) (sc-390883) at dilution 1/1000; secondary Ab. m-IgG $\kappa$  BP-HRP (sc-516102) at 1/10000 dilution). For all the tissues GAPDH was used as a housekeeping protein (loading control) except for the Adipose tissue for which  $\alpha$ -tubulin was used. Results clearly demonstrate hepatocyte specific deletion of G3PP/PGP by the AAV8 mediated cre-recombinase expression. For all the normal and cancer cells  $\beta$ -actin was used as the housekeeping protein (loading control).

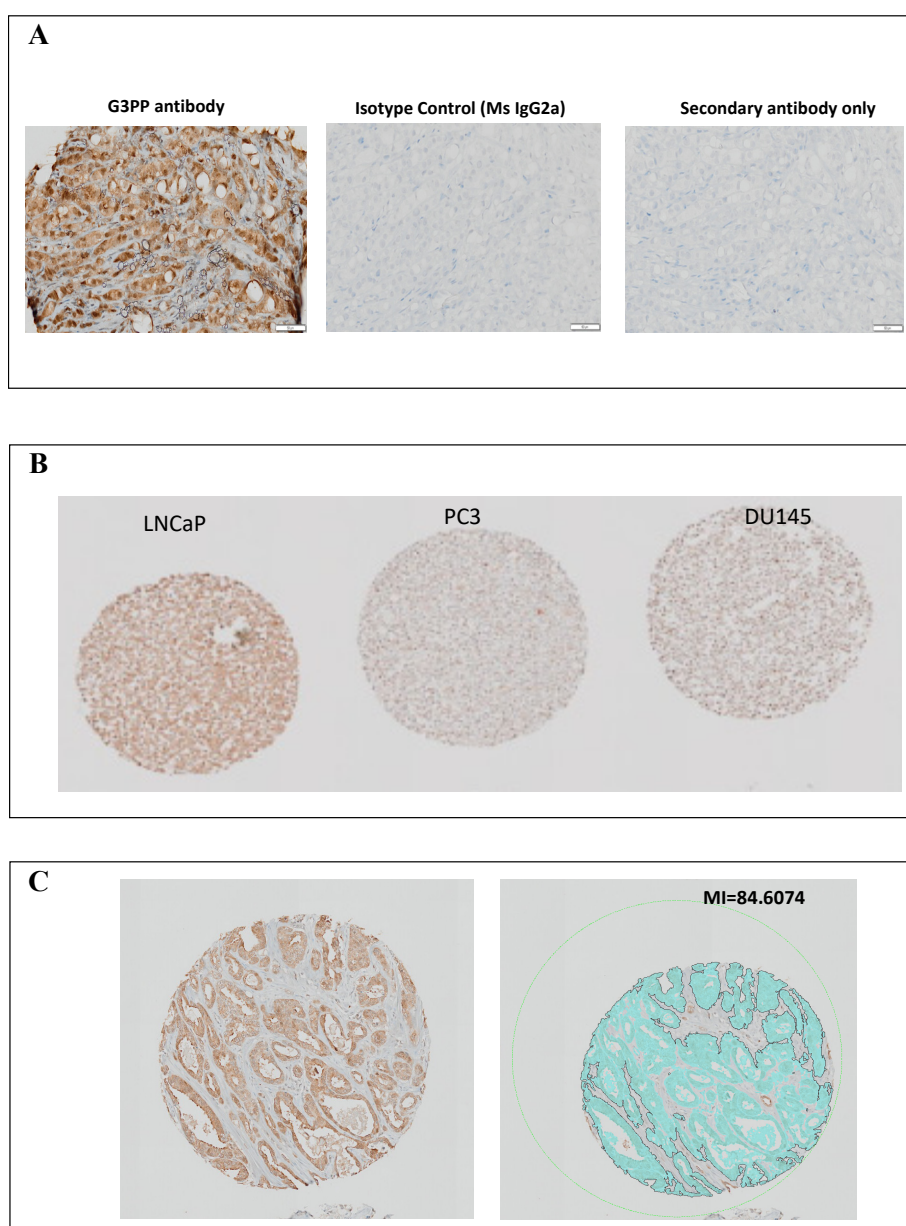

**Figure S2.** Validation of G3PP expression by immunohistochemistry and tumor core analysis using Visiomorph software. (A) Immunohistochemical staining of G3PP in human prostate cancer TMA. Representative images of Positive control (Staining with G3PP antibody; (E-10; sc-390883)) and negative controls (Mice Isotype IgG2a and absence of primary antibody). (B) G3PP

expression assessed by immunohistochemistry in three prostate cancer cell lines. (C) Determination of mean intensity of G3PP epithelial expression using semi-automated analysis protocol packages (APPs) of Visiomorph software. Representative image of IHC staining of G3PP (Left). Representative image of Visiomorph mask used to calculate Mean Intensity (MI) (Right)

**Table 1.** Univariate and multivariate Cox regression analyses predicting biochemical recurrence in the TF123 and CPCBN cohorts after overall follow-up.

| Cox Regression      | Univariate |                     |         |                     | Multivariate |                     |         |                     |
|---------------------|------------|---------------------|---------|---------------------|--------------|---------------------|---------|---------------------|
|                     | TF123      |                     | CPCBN   |                     | TF123        |                     | CPCBN   |                     |
| Parameters          | p-Value    | HR (95% CI)         | p-Value | HR (95% CI)         | p-Value      | HR (95% CI)         | p-Value | HR (95% CI)         |
| Preoperative PSA    | <0.001     | 1.064 (1.038-1.090) | <0.001  | 1.032 (1.028-1.037) | 0.011        | 1.042 (1.009-1.075) | <0.001  | 1.020 (1.014-1.026) |
| pTNM                | <0.001     | 1.810 (1.535-2.136) | <0.001  | 2.832 (2.432-3.298) | 0.001        | 1.399 (1.140-1.718) | <0.001  | 1.590 (1.334-1.895) |
| RP Gleason score    | <0.001     | 3.412 (2.349-4.958) | <0.001  | 1.955 (1.799-2.126) | <0.001       | 2.704 (1.772-4.126) | <0.001  | 1.682 (1.534-1.843) |
| Margin              | <0.001     | 2.902 (2.194-3.837) | <0.001  | 2.353 (1.977-2.801) | 0.015        | 1.598 (1.095-2.332) | <0.001  | 1.695 (1.410-2.038) |
| <b>Tumor Tissue</b> |            |                     |         |                     |              |                     |         |                     |
| G3PP continuous     | 0.003      | 1.021 (1.007-1.036) | <0.001  | 1.025 (1.017-1.033) | 0.142        | 1.011 (0.996-1.026) | <0.001  | 1.015 (1.008-1.023) |
| G3PP dichotomized   | 0.006      | 1.756 (1.172-2.631) | <0.001  | 1.593 (1.319-1.924) | 0.033        | 1.592 (1.038-2.442) | 0.003   | 1.342 (1.103-1.634) |

**Table S2.** Univariate and multivariate Cox regression analyses predicting bone metastasis development in the TF123 and CPCBN TMA cohorts after overall follow-up.

| Cox Regression      | Univariate |                     |         |                     | Multivariate |                     |         |                     |
|---------------------|------------|---------------------|---------|---------------------|--------------|---------------------|---------|---------------------|
|                     | TF123      |                     | CPCBN   |                     | TF123        |                     | CPCBN   |                     |
| Parameters          | p-Value    | HR (95% CI)         | p-Value | HR (95% CI)         | p-Value      | HR (95% CI)         | p-Value | HR (95% CI)         |
| Preoperative PSA    | 0.021      | 1.061 (1.009-1.116) | 0.012   | 1.019 (1.004-1.035) | 0.283        | (0.899-1.032)       | 0.836   | 0.998 (0.978-1.018) |
| pTNM                | <0.001     | 5.679 (3.25-9.923)  | <0.001  | 4.382 (2.864-6.706) | 0.005        | 2.333 (1.292-4.214) | 0.006   | 1.974 (1.219-3.195) |
| RP Gleason score    | <0.001     | 3.508 (2.417-5.092) | <0.001  | 3.305 (2.516-4.341) | <0.001       | 2.977 (1.993-4.447) | <0.001  | 2.855 (2.145-3.800) |
| Margin              | 0.248      | 1.731 (0.682-4.391) | 0.515   | 1.180 (0.717-1.940) | -            | -                   | -       | -                   |
| <b>Tumor Tissue</b> |            |                     |         |                     |              |                     |         |                     |
| G3PP continuous     | 0.046      | 1.030 (1.000-1.060) | <0.001  | 1.034 (1.016-1.053) | 0.146        | 1.026 (0.991-1.061) | 0.077   | 1.018 (0.998-1.037) |
| G3PP dichotomized   | 0.011      | 2.856 (1.277-6.384) | 0.001   | 2.379 (1.428-3.963) | 0.036        | 2.567 (1.062-5.919) | 0.041   | 1.727 (1.023-2.917) |

**Table 3.** Full list of members of the CPCBN group of authors.

| First Name    | Initial | Last Name   |                  | Email                                      | Affiliation                                                                                                                                                                                                            |
|---------------|---------|-------------|------------------|--------------------------------------------|------------------------------------------------------------------------------------------------------------------------------------------------------------------------------------------------------------------------|
| Fred          |         | Saad        | MD, FRCSC        | fredsaad@videotron.ca                      | Département de Chirurgie, Université de Montréal, Centre de recherche du Centre hospitalier de l'Université de Montréal et Institut du cancer de Montréal                                                              |
| Anne-Marie    |         | Mes-Masson  | PhD, FCAHS, FRSC | anne-marie.mes-masson@umontreal.ca         | Département de Médecine, Université de Montréal, Centre de recherche du Centre hospitalier de l'Université de Montréal et Institut du cancer de Montréal                                                               |
| Veronique     |         | Ouellet     | PhD              | veronique.ouellet.chum@ssss.gouv.qc.ca     | Centre de recherche du Centre hospitalier de l'Université de Montréal et Institut du cancer de Montréal                                                                                                                |
| Dominique     |         | Trudel      | MD, FRCSC, PhD   | dominique.trudel.chum@ssss.gouv.qc.ca      | Département de pathologie et de biologie cellulaire, Université de Montréal, Centre de recherche du Centre hospitalier de l'Université de Montréal et Institut du cancer de Montréal et Institut du cancer de Montréal |
| Mathieu       |         | Latour      | MD, FRCSC        | mathieu.latour.chum@ssss.gouv.qc.ca        | Département de pathologie et de biologie cellulaire, Université de Montréal et Centre de recherche du Centre hospitalier de l'Université de Montréal                                                                   |
| Veronique     |         | Barrès      | MSC              | veronique.barres.chum@ssss.gouv.qc.ca      | Centre de recherche du Centre hospitalier de l'Université de Montréal et Institut du cancer de Montréal                                                                                                                |
| Nathalie      |         | Delvoye     | MSc              | nathalie.delvoye.chum@ssss.gouv.qc.ca      | Centre de recherche du Centre hospitalier de l'Université de Montréal et Institut du cancer de Montréal                                                                                                                |
| Jean-Baptiste |         | Lattouf     | MD, FRCSC        | jean-baptiste.lattouf.chum@ssss.gouv.qc.ca | Centre de recherche du Centre hospitalier de l'Université de Montréal et Institut du cancer de Montréal                                                                                                                |
| Pierre        |         | Karakiewicz | MD, FRCSC        | pierre.karakiewicz@umontreal.ca            | Cancer Prognostics and Health Outcomes Unit, Centre hospitalier de l'Université de Montréal                                                                                                                            |
| Armen         |         | Aprikian    | MD, FRCSC        | armen.aprikian@muhc.mcgill.ca              | Department of Surgery (Urology) McGill University and                                                                                                                                                                  |

|           |               |           |                                           |  |                                                                                                          |
|-----------|---------------|-----------|-------------------------------------------|--|----------------------------------------------------------------------------------------------------------|
|           |               |           |                                           |  | Cedars Cancer Centre and McGill University Health Centre                                                 |
| Fadi      | Brimo         | MD, FRCSC | fadi.brimo@mcgill.ca                      |  | Department of Surgery (Urology) McGill University and McGill University Health Centre                    |
| Simone    | Chevalier     | PhD       | simone.chevalier@mcgill.ca                |  | Department of Surgery (Urology) McGill University and McGill University Health Centre Research Institute |
| Lucie     | Hamel         | PhD       | lucie.hamel@mail.mcgill.ca                |  | McGill University Health Centre Research Institute                                                       |
| Eleonora  | Scarlata      | PhD       | eleonora.scarlata@mail.mcgill.ca          |  | McGill University Health Centre Research Institute                                                       |
| Louis     | Lacombe       | MD, FRCSC | louis.lacombe@crchude.quebec.ulaval.ca    |  | Centre de recherche du Centre hospitalier universitaire de Québec-Université Laval                       |
| Alain     | Bergeron      | PhD       | alain.bergeron@crchude.quebec.ulaval.ca   |  | Centre de recherche du Centre hospitalier universitaire de Québec-Université Laval                       |
| Hélène    | Hovington     | BSc       | helene.hovington@crchude.quebec.ulaval.ca |  | Centre de recherche du Centre hospitalier universitaire de Québec-Université Laval                       |
| Hervé     | Brisson       | MSc       | hervebrisson1959@gmail.com                |  | Centre de recherche du Centre hospitalier universitaire de Québec-Université Laval                       |
| Céline    | Veilleux      | Inf.      | celine.veilleux@crchude.quebec.ulaval.ca  |  | Centre de recherche du Centre hospitalier universitaire de Québec-Université Laval                       |
| Neil      | E<br>Fleshner | MD, FRCSC | Neil.Fleshner@uhn.on.ca                   |  | Division of Urology, University of Toronto, Princess Margaret Hospital                                   |
| Theodorus | van der Kwast | MD, FRCSC | Theodorus.vanderKwast@uhn.ca              |  | Cancer Clinical Research Unit (CCRU), Princess Margaret Cancer Centre                                    |
| Martin    | Gleave        | MD, FRCSC | m.gleave@ubc.ca                           |  | Department of Urologic Sciences, The Vancouver Prostate Centre and University of British Columbia        |
| Ladan     | Fazli         | MD, FRCSC | lfazli@prostatecentre.com                 |  | The Vancouver Prostate Centre and University of British Columbia                                         |
